# Supplementary material for: Success in Competition for Space in Two Invasive Coral Species in the western Atlantic – Tubastraea micranthus and T. coccinea
Source: PLoS One. 2015 Dec 18;10(12):e0144581. doi: 10.1371/journal.pone.0144581 (PMC4686162; doi:10.1371/journal.pone.0144581)
Supplement: S1 Table — (XLS) [file pone.0144581.s001.xls]

## Sheet: T. micranthus
												Invasive Species 1 - T. micranthus Competitive Species Data
						Platforms Surveyed
	Competitive Species	Competitive Species	TOTAL			GI-93C			GI-90A			MC-311A			GI-115A			GI-116A			MC-109A			SP-89B			SP-87D			ST-206A			ST-81A	ST-75JA(B)	ST-185A	ST-185B	GI-94B
	All possible names	Final Name	Pr (win)	n w	ni	Pr (win)	n w	ni	Pr (win)	n w	ni	Pr (win)	n w	ni	Pr (win)	n w	ni	Pr (win)	n w	ni	Pr (win)	n w	ni	Pr (win)	n w	ni	Pr (win)	n w	ni	Pr (win)	n w	ni	No T. micranthus observed	No T. micranthus observed	No T. micranthus observed	No T. micranthus observed	No T. micranthus observed
	brown encrusting sponge brown covering sponge,scyphizoans light brown zoanthid, sponge? Light brown sponge	brown encrusting sponge	100	8	8				100	1	1				100	1	1	100	4	4				100	1	1				100	1	1
	deep red,black sponge, zoanthid dark redish brown sponge	dark reddish brown sponge	100	4	4	100	3	3							100	1	1
	Phyllangia spp?	Phyllangia amiericana	100	2	2																100	2	2
	dark grey encrusting algae,sponge,micro anemonies dark grey sponge dark grey sponge dark grey hydroid dark grey encrusting algae/sponge	dark grey sponge	100	1	1							100	1	1
	Didenium candidum	Didenium candidum	100	1	1	100	1	1
	bright yellow algae,sponge	bright yellow sponge	85.7143	12	14	85.7143	12	14
	pink sponge pinkish tan sponge bright pink sponge	pink sponge	72.7273	8	11	66.6667	6	9				100	2	2
	brown sponge,covering microalgae light brown sponge,anemones brown colonial anemones light brown algae covering brown macroalgae, sponge?	brown colonial anemones	69.863	51	73	68.9655	40	58				50	4	8													100	7	7
	grey sponge gray,brown sponge light grey encrusting sponge light grey/white encrusting sponge/algae	light grey sponge	66.6667	4	6	60	3	5				100	1	1
	dark green filamentous algae	dark green filamentous algae	66.6667	2	3	66.6667	2	3
	tan,brown sponge,hydroid brown covering hydroid, anemones Brown fluffy hydroid light brown hydroid	tan sponge with hydroid	58.1818	32	55										100	1	1				53.1915	25	47				85.7143	6	7
	yellow covering sponge yellow sponge	dull yellow sponge	57.1429	4	7	50	1	2							50	1	2				66.6667	2	3
	white sponge white encrusting sponge white sponge, macroalgae little tuffs	white encrusting sponge	57.1429	4	7	50	1	2													60	3	5
	Tubastrea coccinea & Tubastrea diaphana	Tubastrea coccinea	52.6786	118	224	53	106	200	33.3333	1	3	50	1	2				50	6	12				50	1	2	100	1	1	50	2	4
	Tubastrea micranthus	Tubastrea micranthus	50	14	28	50	11	22										50	1	2	50	2	4
	dark brown sponge dark orange/brown sponge dark brown encrusting sponge	dark brown sponge with discrete colonies	50	1	2																50	1	2
	purple hydroid, gorgonian	purple hydroid, gorgonian	50	1	2																						50	1	2
	light blue flat sponge grey/blue sponge	light blue flat sponge	50	1	2	50	1	2
	bright green algae covering bright green filamentous algae bright green macroalgae	bright green filamentous microalgae	48.6486	18	37	48.6486	18	37
	red sponge bright red sponge	red sponge	33.3333	1	3	0	0	1										50	1	2
	Oculina diffusia	Oculina diffusia	0	0	1																0	0	1
	bright white gorgonian,anthozoaid,macroalgae white filamentous algae white fluffy hydroid	bright white anthozoan, small anemones	0	0	2	0	0	2
	TOTALS	TOTALS	58.215	287	493	56.7867	205	361	50	2	4	64.2857	9	14	80	4	5	60	12	20	54.6875	35	64	66.6667	2	3	88.2353	15	17	60	3	5
							205	361		2	4		9	14		4	5		12	20		35	64		2	3		15	17		3	5

## Sheet: T. coccinea
									T. coccinea
												Invasive Species 1 - T. coccinea Competitive Species Data
				Platforms Surveyed
	Competitive Species	Competitive Species	TOTAL			GI-93C			GI-90A			MC-311A			GI-115A			GI-116A			MC-109A			SP-89B			SP-87D			ST-206A			ST-81A			ST-185B			GI-94B			ST-185A			ST-75JA(B)
	All possible names	Final Name	Pr (win)	n w	ni	Pr (win)	n w	ni	Pr (win)	n w	ni	Pr (win)	n w	ni	Pr (win)	n w	ni	Pr (win)	n w	ni	Pr (win)	Pr (win)	ni	Pr (win)	n w	ni	Pr (win)	n w	ni	Pr (win)	n w	ni	Pr (win)	n w	ni	Pr (win)	n w	ni	Pr (win)	n w	ni	Pr (win)	n w	ni	No T. coccinea observed
	Millepora?	Millepora?	100	1	1																									100	1	1
	Tubastrea micranthus	Tubastrea micranthus	78.1991	165	211	81.4815	154	189	50	2	4	50	1	2				55.5556	5	9				50	1	2	0		1	50	2	4
	blue/green sponge dark blue/gray sponge	blue/green sponge	73.3333	11	15							50	1	2	75	3	4																						77.7778	7	9
	Didenium candidum	Didenium candidum	72.7273	8	11	100	2	2																			66.6667	6	9
	dark brown/black sponge dark orange/brown sponge dark brown/maroon encrusting sponge	dark brown sponge with discrete colonies	71.2871	72	101	75	3	4	70.4545	31	44	50	4	8	100	1	1				100	4	4	75	6	8	100	2	2	66.6667	2	3							77.7778	7	9	66.6667	12	18
	brown sponge,covering microalgae mat light brown sponge/anemones brown colonial anemones light brown algae covering brown macroalgae, sponge? brown covering sponge,scyphizoans light brown zoanthid, sponge?	brown colonial anemones	71.0769	231	325	70	42	60				66.6667	4	6	66.6667	12	18	86.2069	25	29	69.4915	41	59				73.6842	14	19	66.6667	40	60				100	2	2	66.6667	38	57	86.6667	13	15
	grey sponge gray,brown sponge light grey encrusting sponge light grey/white encrusting sponge/algae light grey/white covering hydroid/sponge	light grey sponge	68.4729	139	203	46.1538	6	13	71.4286	10	14	90	9	10				83.3333	10	12	100	2	2				66.6667	46	69	85.7143	6	7				46.6667	7	15	45.8333	11	24	86.4865	32	37
	black sponge (maybe micranthus) black undeterminable substrate looks like black sponge but marked in notes as not so	black sponge	67.7966	200	295	100	2	2	73.2143	41	56	67.5676	25	37	91.6667	11	12	51.1111	23	45	59.0909	13	22	66.6667	4	6	63.6364	14	22	73.0769	19	26				76.9231	10	13	70	14	20	70.5882	24	34
	yellow covering sponge yellow sponge fluffy yellow sponge/macroalgae(?) moves in current mustard yellow sponge	dull yellow sponge	65.7143	92	140	75	3	4				61.039	47	77	75	15	20	100	2	2	100	2	2				75	3	4	80	4	5				60	3	5	65	13	20	0	0	1
	bright orange sponge orange/yellow sponge orange sponge light red/orange sponge	orange sponge	64.1791	43	67	100	1	1				56.25	9	16	66.6667	4	6	60	6	10							75	3	4	80	12	15				33.3333	1	3	50	4	8	75	3	4
	brown encrusting sponge Light brown sponge fuzzy brown sponge Brown fluffy hydroid	brown encrusting sponge	63.6684	361	567	66.8966	97	145	73.5294	50	68	54	81	150	47.3684	9	19	67.6471	23	34				64	48	75	50	1	2	66.6667	8	12	50	1	2	61.5385	8	13	68.1818	15	22	80	20	25
	pale pink sponge light purple/pink flat sponge dark pink/light red sponge	pale pink sponge	63.6364	42	66	61.5385	16	26	70	14	20	53.8462	7	13				100	3	3				50	2	4
	dark purple sponge purple sponge deep purple sponge/hydroid	purple sponge	63.0252	75	119	100	2	2				56.25	18	32	75	6	8	50	3	6	66.6667	4	6	66.6667	6	9	76.9231	10	13	50	4	8							50	2	4	64.5161	20	31
	deep red,black sponge, zoanthid dark redish brown sponge	dark reddish brown sponge	60.9272	92	151	85.7143	6	7				50	3	6	55.7377	34	61	58.0645	18	31	68.75	11	16	50	8	16				100	2	2							80	8	10	100	2	2
	bright yellow algae,sponge, zoanthid	bright yellow sponge	59.7403	46	77	54.6875	35	64	80	4	5							100	3	3							100	1	1	75	3	4
	light blue flat sponge grey/blue sponge	light blue flat sponge	59.4595	22	37	75	3	4																															58.3333	14	24	55.5556	5	9
	red sponge bright red sponge deep red sponge red/marroon covering sponge	red sponge	59.2511	269	454	81.25	13	16	58.6207	34	58	54	81	150	60.7843	31	51	62.5	5	8	100	3	3	80	4	5	70.5882	12	17	66.6667	16	24				44.8276	13	29	59.6154	31	52	63.4146	26	41
	pink sponge pinkish tan sponge bright pink sponge	pink sponge	58.7097	91	155	42.5532	20	47	53.8462	14	26	50	2	4				60	18	30				50	2	4										87.5	7	8	71.4286	15	21	86.6667	13	15
	tan,brown sponge,hydroid tan sponge/zoanthid brown covering hydroid, anemones light brown hydroid yellow/tan covering zoanthid/sponge	tan sponge with hydroid	57.9439	124	214	100	1	1	44.4444	8	18	54.0984	33	61	77.7778	14	18	100	5	5	50	1	2	66.6667	2	3	75	6	8	100	11	11				40.625	13	32	61.1111	11	18	51.3514	19	37
	dark grey encrusting algae,sponge,micro anemonies dark grey sponge dark grey sponge dark grey hydroid dark grey encrusting algae/sponge	dark grey sponge	55.5556	45	81	33.3333	1	3	53.8462	21	39	64.2857	18	28																100	1	1				33.3333	3	9	100	1	1
	white sponge white encrusting sponge white sponge, macroalgae little tuffs white splotch/sponge	white encrusting sponge	54.902	112	204	52.381	11	21	51.6129	16	31	74.359	29	39	66.6667	10	15	100	4	4	56.25	9	16	66.6667	6	9	100	5	5	75	3	4							29.6296	16	54	50	3	6
	bright green algae covering bright green filamentous algae bright green macroalgae	bright green filamentous microalgae	53.75	43	80	62.5	35	56																						50	1	2							30	6	20	50	1	2
	Tubastrea coccinea & Tubastrea diaphana	Tubastrea coccinea	48.1684	1144	2375	39.1621	215	549	51.5284	118	229	49.789	118	237	49.4737	47	95	50.2513	100	199	50	72	144	51.3158	78	152	50.7692	66	130	48.9796	72	147				50	40	80	57.3864	101	176	49.3671	117	237
	dark green filamentous algae hydrozoan? Green filament algae?	dark green filamentous algae	48	12	25	48	12	25
	bright white gorgonian,anthozoaid,macroalgae white filamentous algae white fluffy hydroid/bryozoan white fuzzy hydroid	bright white anthozoan, small anemones	47.9592	94	196	52.5	21	40	52.5	21	40	42.8571	6	14	57.1429	8	14																			16.6667	1	6	45.4545	15	33	44.898	22	49
	Madracis sp (decactis?)	Madracis sp (decactis?)	42.8571	9	21										33.3333	1	3	40	4	10	50	2	4				50	2	4
	purple hydroid, gorgonian purple fuzzy hydroid/sea fan	purple hydroid, gorgonian	42.2222	19	45				75	3	4	37.5	6	16				33.3333	1	3							50	3	6										33.3333	2	6	40	4	10
	pink sea whip red sea whip	red sea whip	16.6667	1	6							0		4							50	1	2
	purple bivalve	purple bivalve	0	0	2	0		2
	orange sea whip	orange sea whip	0	0	1							0		1
	brown sea whip	brown sea whip	0	0	1							0		1
	TOTALS	TOTALS	57.2771	3534	6170	54.6376	701	1283	58.9939	387	656	54.9234	502	914	59.7101	206	345	58.2393	258	443	58.5106	165	282	56.9966	167	293	61.3924	194	316	61.6071	207	336	50	1	2	50.2326	108	215	56.2925	331	588	58.6387	336	573
							701	1283		387	656		502	914		206	345		258	443		165	282		167	293		194	316		207	336		1	2		108	215		331	588		336	573
